1 ***Plasmodium* SAS4/CPAP is a flagellum basal body component during male**  
2 **gametogenesis, but is not essential for parasite transmission**

3

4

5 Mohammad Zeeshan<sup>#1,2</sup>, Declan Brady<sup>#1</sup>, Robert Markus<sup>1</sup>, Sue Vaughan<sup>2</sup>, David  
6 Ferguson<sup>3</sup>, Anthony A. Holder<sup>4</sup>, Rita Tewari<sup>1\*</sup>

7

8 <sup>1</sup>School of Life Sciences, University of Nottingham, Nottingham, UK

9 <sup>2</sup>Faculty of Infectious and Tropical Diseases, London School of Hygiene & Tropical  
10 Medicine, London, UK

11 <sup>3</sup>Department of Biological and Medical Sciences, Faculty of Health and Life Science,  
12 Oxford Brookes University, Oxford, UK

13 <sup>4</sup>Malaria Parasitology Laboratory, The Francis Crick Institute, London, UK

14

15 <sup>#</sup>Contributed equally

16 <sup>\*</sup>For correspondence

17 Rita Tewari: [rita.tewari@nottingham.ac.uk](mailto:rita.tewari@nottingham.ac.uk)

18

19

20

21 **Running Title:** The basal body protein SAS4 is dispensable in malaria parasite  
22 proliferation

23

24

25 **Abstract**

26 The centriole/basal body (CBB) is an evolutionarily conserved organelle acting as a  
27 microtubule organising centre (MTOC) to nucleate cilia, flagella and the centrosome.  
28 SAS4/CPAP is a conserved component associated with BB biogenesis in many  
29 model flagellated cells. *Plasmodium*, a divergent unicellular eukaryote and causative  
30 agent of malaria, displays an atypical closed mitosis with an MTOC, reminiscent of  
31 the acentriolar MTOC, embedded in the nuclear membrane at most proliferative  
32 stages. Mitosis during male gamete formation is accompanied by flagellum  
33 formation: within 15 minutes, genome replication (from 1N to 8N) and three  
34 successive rounds of mitosis without nuclear division occur, with coordinated  
35 axoneme biogenesis in the cytoplasm resulting in eight flagellated gametes. There  
36 are two MTOCs in male gametocytes. An acentriolar MTOC located with the nuclear  
37 envelope and a centriolar MTOC (basal body) located within the cytoplasm that are  
38 required for flagellum assembly. To study the location and function of SAS4 during  
39 this rapid process, we examined the spatial profile of SAS4 in real time by live cell  
40 imaging and its function by gene deletion. We show its absence during asexual  
41 proliferation but its presence and coordinated association and assembly of SAS4  
42 with another basal body component, kinesin8B, which is involved in axoneme  
43 biogenesis. In contrast its separation from the nuclear kinetochore marker NDC80  
44 suggests that SAS4 is part of the basal body and outer centriolar MTOC residing in  
45 the cytoplasm. However, deletion of the SAS4 gene produced no phenotype,  
46 indicating that it is not essential for male gamete formation or parasite transmission  
47 through the mosquito.

48

49

50 **Introduction**

51 Centriole/basal bodies (CBBs) are associated with the microtubule organising centre  
52 (MTOC) that nucleates cilia, flagella and centrosomes, and are conserved ancestral  
53 organelles in eukaryotes (Carvalho-Santos et al., 2011; Nabais et al., 2020).  
54 Centrioles and basal bodies (BBs) share structural features and BBs are mainly  
55 associated with flagella or cilia organisation, and extend to produce an axoneme  
56 (Marshall, 2008). The canonical view of CBB biogenesis is associated with their role  
57 in the cell cycle: centriole duplication occurs, and each is segregated to a daughter  
58 cell during mitosis. However, in some organisms BB biology is more diverse, for  
59 example where the centrioles or BBs form de novo or exhibit non-canonical  
60 biogenesis, as observed in *Naegleria* and in some parthenogenic insect eggs (Fritz-  
61 Laylin and Fulton, 2016; Nabais et al., 2020; Nabais et al., 2017). SAS4/SAS6 are  
62 ancestral core proteins involved in basal body biogenesis, as predicted by  
63 phylogenetic analysis (Carvalho-Santos et al., 2010; Hodges et al., 2010).

64 *Plasmodium spp.*, the causative agents of malaria, are apicomplexan parasites  
65 transmitted by mosquito vectors. Asexual replication in *Plasmodium* is by atypical  
66 closed endomitosis, with remarkable plasticity in unconventional aspects of cell  
67 division during its complex life cycle. In a crucial stage for parasite transmission,  
68 sexually committed cells - the male and female gametocytes – are formed in the  
69 mammalian host and activated following ingestion by the female mosquito vector  
70 during its blood meal. Activation in the midgut results in gametogenesis and  
71 formation of extracellular female and flagellate male gametes over a period of 15  
72 minutes (Sinden, 1991; Sinden et al., 2010). During male gametogenesis within 8  
73 minutes there are three rounds of genome replication from haploid (1N) to octaploid  
74 (8N) without nuclear division and this is followed by karyokinesis and cytokinesis

75 resulting in eight haploid flagellated gametes in a process known as exflagellation  
76 (Sinden et al., 2010). Flagella assembly is very rapid and atypical, occurring within  
77 15 minutes and without intra-flagellar transport (IFT) (Sinden, 1991; Sinden et al.,  
78 2010). There are no flagella at other stages of the life cycle and hence no clear  
79 centriole or basal body is observed at other proliferative life cycle stages. Clear  
80 centrioles with 9+1 or 9+2 microtubules can only be seen in flagella biogenesis  
81 during male gamete formation in *Plasmodium* (Sinden et al., 2010; Straschil et al.,  
82 2010; Zeeshan et al., 2019a). So-called centriolar plaques located within the nuclear  
83 envelope were described during nuclear division in asexual stages of proliferation  
84 and appears to serve as an MTOC in nuclear spindle formation (Arnot et al., 2011;  
85 Gerald et al., 2011). Centrin has been mapped to these plaques and used as a  
86 marker for the MTOC to follow the asynchronous replication dynamics during  
87 asexual replication. However, no centriole is present and these plaques resemble an  
88 acentriolar MTOC organising hemispindle (Bertiaux et al., 2021; Mahajan et al.,  
89 2008; Roques et al., 2019; Simon et al., 2021). In male gametocytes there are two  
90 MTOCs: an inner acentriolar MTOC located with the nuclear envelope and outer  
91 centriolar basal bodies located within the cytoplasm that are required for flagellum  
92 assembly. The marker, NDC80 shows that kinetochores are clustered in the nucleus  
93 in asexual stages with a rodlike structure at spindle formation during the three  
94 successive rounds of genome replication during in gametogenesis that can be  
95 differentiated from the outer MTOC (Zeeshan et al., 2020b).

96 BB structure and the real time dynamics of its formation during this accelerated  
97 genome replication and chromosome segregation remain unclear in *Plasmodium*,  
98 although earlier ultrastructural studies by electron microscopy (EM) suggested  
99 atypical BB structure and flagella. (Sinden et al., 1976). Ultrastructure studies also

100 confirmed that the nuclear envelope remains intact during the closed mitosis, so  
101 events in the nucleus and cytoplasm have to be coordinated for flagellated gamete  
102 formation to occur: the two MTOCs need to be organised and coordinated for both  
103 these compartments so that each microgamete receives a single flagellum. In recent  
104 studies we have shown that some molecular motors like Kinesin-8X and Kinesin-5  
105 are associated with the spindle in the nuclear compartment (Zeeshan et al., 2020a;  
106 Zeeshan et al., 2019b) and others like Kinesin-8B and Kinesin-X4 are involved in  
107 axoneme biogenesis (Zeeshan et al., 2019a). Therefore the MTOC during male  
108 gametogenesis may be described as composed of an outer centriolar BB, which  
109 organises the axoneme and an inner acentriolar MTOC similar to the spindle pole  
110 body of yeast from where the mitotic spindle and chromosome segregation is  
111 organised (Zeeshan et al., 2019a; Zeeshan et al., 2019b). An earlier study with the  
112 basal body marker SAS6 showed it was present outside the nucleus in the  
113 cytoplasmic BB compartment during male gametogenesis and its deletion ablated  
114 male gametogenesis, blocking parasite transmission (Marques et al., 2015).  
115 Recently we and others have shown the dynamic profile of Kinesin-8B, another BB  
116 marker, in axoneme assembly and its deletion leads to disruption of axoneme  
117 assembly and loss of flagellum formation (Depoix et al., 2020; Zeeshan et al.,  
118 2019a).

119 Since SAS4 and SAS6 are both ancestral components of BB formation (Carvalho-  
120 Santos et al., 2011; Carvalho-Santos et al., 2010; Hodges et al., 2010), here we  
121 have investigated the real time temporal profile of SAS4 during male gametogenesis,  
122 particularly during the 8 minutes of rapid genome replication following activation. We  
123 also investigated its subcellular association with kinetochore and axoneme  
124 biogenesis by genetically crossing SAS4-green fluorescent protein (GFP) and

125 NDC80-mCherry or Kinesin-8B-mCherry transgenic parasite lines to obtain male  
126 gametocytes expressing both fluorescent markers. To examine the role of SAS4 we  
127 generated SAS4 gene knockout (KO) parasites. The results reveal a de novo rapid  
128 synthesis of SAS4 and suggest an association with the outer centriolar BB as a  
129 doublet during male gametogenesis. However, in contrast to the SAS6 KO mutant,  
130 the SAS4 KO mutant developed normally indicating that this protein is not essential  
131 for parasite growth in the mosquito or transmission.  
132

133 **Results**

134 **Live cell imaging of SAS4-GFP reveals de novo basal body formation and its**  
135 **rapid dynamics during male gametogenesis.**

136 In order to study the expression and location of SAS4 during the *Plasmodium* life  
137 cycle, we generated a SAS4-GFP transgenic *P. berghei* line expressing the protein  
138 with a C-terminal GFP tag, by inserting an in-frame *gfp* coding sequence at the 3'  
139 end of the endogenous *sas4* locus using single homologous recombination (Fig  
140 S1A). PCR analysis of genomic DNA using locus-specific diagnostic primers  
141 indicated correct integration of the GFP tagging construct (Fig S1B). This transgenic  
142 line was used to examine the spatiotemporal profile of SAS4-GFP protein expression  
143 and location by live cell imaging. By microscopy, SAS4 was not detectable in  
144 asexual blood stages but was located in the cytoplasm of male gametocytes (Fig 1).  
145 Therefore, we investigated its expression and location throughout male  
146 gametogenesis. Male gametogenesis is a rapid process of three rounds of genome  
147 replication, de-novo basal body formation and axoneme assembly followed by  
148 emergence of eight flagellated male gametes, known as exflagellation, that  
149 completes within 12-15 minutes (Sinden et al., 2010, Zeeshan, 2019 #114).

150 Live cell images showed multiple discrete SAS4-GFP foci in the cytoplasm of  
151 developing gametocytes, with the number of foci depending on the length of time  
152 after activation (Fig 1A). Within one minute post activation (mpa) of the gametocyte,  
153 four closely associated foci forming an SAS4-GFP tetrad were observed in the  
154 cytoplasm at one side of the nucleus (Fig 1A). The SAS4-GFP tetrad split later into  
155 two halves that moved apart to opposite sides of the nucleus within 3 mpa, still  
156 retaining the cytoplasmic location (Fig 1A, B and video S1). The two SAS4-GFP  
157 tetrads each split again into two doublets of SAS4-GFP and separated from each

158 other within 4-5 mpa (Fig 1A, C and video S2). A final round of splitting and  
159 separation occurred to produce eight discrete SAS4-GFP foci (Fig 1A). A schematic  
160 diagram of this process is provided in the upper panel of Figure 1A.

161 To resolve further the SAS4-GFP foci after male gametocyte activation, 3D-  
162 structured illumination microscopy (SIM) was performed on fixed gametocytes  
163 expressing SAS4-GFP. The SIM images clearly showed two tetrads of SAS4-GFP in  
164 gametocytes at 2 mpa and four doublets by 4 mpa (Fig 1 D) indicating that SAS4 is  
165 present in closely apposed doublets.

166

### 167 **SAS4 associates with Kinesin-8B, a molecular motor that regulates basal body** 168 **formation and axoneme assembly**

169 Recently we showed that Kinesin-8B associates with the BBs and axonemes during  
170 *Plasmodium* male gametogenesis (Zeeshan et al., 2019a); live cell imaging showed  
171 the association of Kinesin-8B with the tetrad of BBs that serve as a template for  
172 axoneme assembly (Zeeshan et al., 2019a). To establish whether SAS4 is part of  
173 the BB and associated with tetrad of BB formation and axoneme assembly, we  
174 examined its location compared with that of Kinesin-8B. A parasite line expressing  
175 both SAS4-GFP and Kinesin-8B-mCherry was produced and used for live cell  
176 imaging by fluorescence microscopy to establish the spatiotemporal relationship of  
177 these two proteins. Within 1 mpa, the SAS4-GFP tetrad was observed at the centre  
178 of four Kinesin-8B-mCherry foci in the cytoplasm at one side of the nucleus (Fig 2A).  
179 Within 3 mpa we observed the duplication and separation of tetrads of SAS4 and  
180 Kinesin-8B (Fig 2A). To further resolve this dissociation, we performed 3D-SIM on  
181 fixed gametocytes expressing these two proteins. 3D-SIM images clearly show the  
182 SAS4 tetrads at the centre of kinesin-8B tetrads (Fig 2A, right hand panel). After



183 arrival at either side of the nucleus, the emergence of axonemes was observed, as  
184 revealed by Kinesin-8B that later is only associated with axonemes (Fig 2A). The  
185 SAS4-GFP tetrad later split into doublets, which remain associated with growing  
186 axonemes labelled with Kinesin-8B-mCherry during their further split and separation  
187 (Fig 2A). At the end of the process, we observed eight SAS4-GFP foci associated  
188 with fully assembled axonemes (Fig 2A). These data shows that SAS4 is associated  
189 with kinesin-8B during a very early stage of basal body formation and remains  
190 associated with it throughout axoneme assembly during the rest of male  
191 gametogenesis. A schematic diagram of this process is provided in Fig 2B.

192

193 **The spatiotemporal locations of SAS4 and the kinetochore protein NDC80**  
194 **reveal basal body formation and mitotic spindle dynamics are coupled**  
195 **processes**

196 During mitosis in male gametogenesis, genome replication and chromosome  
197 segregation are rapid processes. To determine the relationship between mitosis in  
198 the nucleus and basal body formation in the cytoplasm, a parasite line expressing  
199 both SAS4-GFP, and kinetochore protein NDC80-mCherry was used to image these  
200 markers in the same cell. Within 1 mpa, the SAS4-GFP tetrad and the NDC80-  
201 mCherry focal point were adjacent but not overlapping close to the nuclear DNA (Fig  
202 2C), with SAS4 in a cytoplasmic location and NDC80 closer to the DNA. Later in  
203 gametogenesis the SAS4 tetrad split into two parts with the NDC80 signal extending  
204 to form a bridge between them, which is presumably the mitotic spindle decorated  
205 with kinetochores (Fig 2C). As the two SAS4 tetrads moved apart the NDC80-  
206 positive bridge extended across one side of the nucleus and then separated into two  
207 halves (Fig 2C). To resolve further the location of SAS4 tetrads and the NDC80

208 bridge, we used 3D-SIM on fixed gametocytes expressing these two labelled  
209 proteins. The 3D-SIM images clearly showed the two SAS4 tetrads at both ends of  
210 the NDC80-positive bridge that then divides into two halves (Fig 2C, right hand  
211 panel). The two halves of the NDC80-positive bridge further extend to form two  
212 bridges, along with concurrent separation of the SAS4 tetrads into doublets (Fig 2C).  
213 This process of NDC80-positive bridge formation and separation continues for a third  
214 cycle, resulting in eight NDC80 and SAS4 foci (Fig 2B). During the whole process of  
215 NDC80-labelled bridge formation and separation, SAS4 was located adjacent to but  
216 never overlapped with NDC80 (Fig 2C). A schematic diagram for this process is  
217 provided in Figure 2B.

218

### 219 **Electron microscopy analysis suggests that SAS4 is part of an outer centriolar** 220 **BB MTOC in male gametocytes**

221 From the literature it is unclear whether the acentriolar MTOC and BB centriolar  
222 MTOC are linked and doing similar organisation or there are two independent  
223 MTOCs, one that is organising the spindle dynamics in the nucleus and other  
224 organising the axoneme biogenesis. Therefore we examined various transmission  
225 electron micrographs (TEMs) of male gametocytes and compared them with some  
226 of the images of *P. yoelii* male gametocytes described earlier by Robert Sinden  
227 (Sinden et al., 1976). Our analysis supports the relative location of basal body,  
228 axoneme, nucleus and kinetochore, as described by Sinden. In these micrographs,  
229 two adjacent electron dense masses are observed on either side of the nuclear  
230 membrane (Figs 3A, S2). The outer mass is a typical basal body with nine single  $\alpha$ -  
231 tubules, whereas the inner part is a nuclear pole. Both structures serve as MTOCs:  
232 the basal body for axoneme microtubules (MTs) and the nuclear pole for spindle

233 MTs to which kinetochores are attached (Figs 3A, S2). During mitosis in the asexual  
234 blood stages there is no basal body but the MTOC for mitotic spindle MTs is present  
235 and located within the nuclear envelope. This observation is consistent with the  
236 location of two separate and distinct MTOC. The first one is the nuclear pole (NP) in  
237 gametocytes that serves as an inner acentriolar MTOC for spindle MTs. and the  
238 second is where SAS4, SAS6 and kinesin-8B are located in the basal body and part  
239 of outer centriolar MTOC (Fig 3C). These two independent MTOC have to be  
240 coordinated for the successful generation of flagellate male gamete.

241

#### 242 ***Plasmodium* SAS4 is dispensable for parasite proliferation and transmission**

243 Based on the expression and location of SAS4 during male gametogenesis and the  
244 essential role of basal body protein SAS6 in male gametogenesis (Marques et al.,  
245 2015) we examined the importance of SAS4 in male gamete formation. We deleted  
246 the gene in a *P. berghei* line constitutively expressing GFP (WT-GFP, Fig S1C)  
247 (Janse et al., 2006). Diagnostic PCR showed successful integration of the targeting  
248 construct at the *sas4* locus (Fig S1D) and quantitative real time PCR (qRT-PCR)  
249 showed the lack of *sas4* expression in gametocytes, confirming the deletion of  
250 the *sas4* gene (Fig 4A). Successful creation of the  $\Delta$ SAS4 parasite indicated that the  
251 gene is not essential in asexual blood stages, consistent with the absence of the  
252 protein's expression at this stage of the life cycle in wild type parasites. Further  
253 phenotypic analysis of the  $\Delta$ SAS4 parasite was carried in comparison with the  
254 parental parasite (WT-GFP).

255 First, we examined male gametogenesis, and surprisingly, we observed no  
256 significant difference in flagellate gamete formation known as exflagellation in the  
257  $\Delta$ sas4 parasite in comparison with the WT-GFP parasite (Fig 4B). Zygote formation

258 and its differentiation to ookinete development were also unaffected (Fig 4C). To  
259 assess the effect of *sas4* gene deletion on oocyst development, the number of GFP-  
260 positive oocysts on the mosquito gut wall was counted in mosquitoes fed with  
261 either  $\Delta$ SAS4- or WT-GFP parasites, there was no significant difference in the  
262 number or size of  $\Delta$ SAS4 oocysts compared to WT-GFP controls at 14- and 21-  
263 days post-infection (Fig 4D, E). The number of sporozoites produced by  $\Delta$ SAS4 and  
264 WT-GFP parasites was comparable (Fig 4F), and although there was a slight  
265 reduction in numbers of  $\Delta$ SAS4 salivary gland sporozoites, the difference from WT-  
266 GFP numbers was not significant (Fig 4G). The infectivity of the  $\Delta$ SAS4 sporozoites  
267 to naïve mice was similar to that of WT-GFP parasites (Fig 4H).

268

## 269 **Discussion**

270 BBs are centriolar organelles that nucleate flagella and cilia, and are important  
271 MTOC components, with different and distinct ways of organisation that have arisen  
272 during centriole evolution in eukaryotes (Carvalho-Santos et al., 2011; Nabais et al.,  
273 2020) SAS6 and SAS4 are core protein components of this organelle (Carvalho-  
274 Santos et al., 2010; Hodges et al., 2010). *Plasmodium*, the evolutionarily divergent  
275 unicellular eukaryote and causative agent of malaria, shows a rapid and atypical  
276 process leading to formation of flagellated male gametes during this stage in its life  
277 cycle, within the mosquito gut and a crucial transmission stage. Our recent and  
278 earlier ultrastructure studies had identified an amorphous basal body in the  
279 cytoplasmic compartment of the male gametocyte, but the properties and function  
280 during unusual flagellum formation of SAS4, a conserved CBB molecule, were  
281 unknown. During the *Plasmodium* life cycle a centriole is only present during male  
282 gametogenesis, whereas during mitosis in other proliferative stages only the

283 amorphous acentriolar MTOC is present (Sinden, 1991). Here we have investigated  
284 by live cell imaging in real time the profile of SAS4/CPAP to understand whether it is  
285 involved in axoneme biogenesis during male gamete formation and how it's  
286 replication is coordinated during mitosis.

287

288 Male gametocyte activation results in rapid genome replication from 1N to 8N in 8  
289 min, with three rounds of mitosis without nuclear division (Sinden, 1991). Our  
290 imaging suggests a very rapid de novo formation of SAS4 during male  
291 gametogenesis, with a dynamic profile in the cytoplasm. The number of discrete  
292 SAS4-GFP foci duplicates as genome replication and rounds of mitosis occur. In  
293 most cells, SAS4 appears to coalesce into a close doublet at the beginning of the  
294 first mitosis and then this structure replicates in coordination with replication of the  
295 genome. We show that eight BB-like structures, each with a close SAS4 doublet are  
296 formed de novo and present at the end of genome replication and mitosis. These  
297 SAS4 foci appear to be in the cytoplasm of the cell and associated with the outside  
298 of the nucleus, suggesting that SAS4 is part of the basal body outer MTOC of. To  
299 confirm its location, we generated parasite lines expressing both SAS4-GFP and  
300 either the cytoplasmic BB and axoneme marker, Kinesin-8B-mCherry (Zeeshan et  
301 al., 2019a), or NDC80-mCherry, a kinetochore marker of the mitotic spindle in the  
302 nucleus (Zeeshan et al., 2020b). Real time imaging clearly delineated the spatial  
303 organisation of SAS4 with respect to these complementary cytoplasmic and nuclear  
304 markers. It was clear that SAS4 is part of the basal body MTOC structure with a  
305 similar spatial profile to that of Kinesin-8B. However, SAS4 and Kinesin-8B do not  
306 co-localise and the images suggest that SAS4 may be located at the centre of the  
307 BB that nucleates axoneme assembly during the male cell differentiation. While

308 Kinesin-8B is part of the axoneme assembly, in contrast SAS4 is limited to the basal  
309 body. We show that SAS4 duplication is synchronized with the accumulation of  
310 NDC80 and spindle formation during successive rounds of genome replication during  
311 mitosis. However, as we have shown previously the NDC80 foci are within the  
312 nucleus, our analysis suggests that SAS4 is likely a component of the BB/MTOC in  
313 the outer cytoplasmic compartment. We suggest that the MTOC/spindle assembly  
314 marked with NDC80 inside the nucleus is coupled together with the cytoplasmic  
315 BB/MTOC as cytoskeletal structures. Although *Plasmodium* undergoes closed  
316 mitosis, it is possible that these two components of the cell can coordinate mitosis  
317 and axoneme assembly to ensure that there is one flagellum for each  
318 genome/nucleus at exflagellation. These two components may be inter-connected as  
319 part of a bipartite MTOC. A similar structure has been implicated in replication of  
320 another apicomplexan parasite, *Toxoplasma gondii* (Suvorova et al., 2015) using  
321 asexual cells. Whether biflagellated male gamete of *Toxoplasma* and *Eimeria* has  
322 similar structure is not known. In *Toxoplasma* or *Eimeria* where there is a centriole in  
323 the cytoplasm associated with the nuclear spindle during asexual division, this  
324 becomes the basal body at the end of nuclear division to initiate the flagella  
325 formation. (Ferguson et al., 1977; Ferguson et al., 1974). In trypanosomes the BB is  
326 coupled with kinetoplast DNA during cell division (Vaughan and Gull, 2015) and  
327 SAS4 controls the cell cycle transition (Hu et al., 2015), suggesting that the evolution  
328 of BBs has depended upon the requirement of the cell to multiply in different niches.  
329 Axoneme and flagellum formation only occur during male gametogenesis in  
330 *Plasmodium*, and their absence during blood stage schizogony is mirrored by the  
331 lack of SAS4 expression at this stage of the life cycle.

332 We next examined the functional role of SAS4 in *Plasmodium* by examining the  
333 phenotype resulting from gene deletion. In contrast to *Plasmodium* SAS6 that was  
334 shown to be important for male gamete formation (Marques et al., 2015), we found  
335 that SAS4 is not essential for exflagellation as there was no significant change in  
336 flagellated gamete formation. At other stages of parasite development, including  
337 zygote formation, ookinete and sporozoite development, and parasite transmission  
338 and infectivity, no significant differences from the wild type parasite were observed.  
339 We conclude that the presence of SAS4 is not essential for parasite development  
340 throughout the life cycle. It is possible that other proteins compensate for SAS4  
341 function, or it has a redundant function in *Plasmodium*.

342 It will be interesting in the future to analyse in depth the 3D structure of *Plasmodium*  
343 BBs and their components, for example by using these BB and mitotic spindle  
344 markers and correlative light and electron microscopy (CLEM) as described recently  
345 for the bryophyte *Physcomitrium* (Gomes Pereira et al., 2021). In a recent study  
346 Raspa and Brochet have used expansion microscopy to study the MTOC structures  
347 in *Plasmodium* (Raspa and Brochet, 2021) The protein interactome obtained using  
348 these lines and others will provide tools to identify BB components and understand  
349 their evolution in this divergent organism, which assembles the complete BB  
350 complement de novo in eight minutes. This is extremely fast, for example when  
351 compared to the rapid assembly that takes one hour in *Naegleria* (Fritz-Laylin et al.,  
352 2016). These approaches may also identify the conserved and divergent molecules  
353 that enable the extremely fast flagellum assembly, which is one of the fastest known  
354 and where accuracy may be compromised because of the need for speed. (Fritz-  
355 Laylin et al., 2016; Sinden et al., 2010).

356 Overall, this study shows that SAS4 is part of an outer cytoplasmic BB MTOC where  
357 there is a need for coordination between flagellum assembly in the cytoplasm and  
358 genome replication in the nucleus so that there is one flagellum for each haploid  
359 nucleus formed following karyokinesis. Formation of the BB occurs de novo and the  
360 entire process is very rapid. However, the deletion of the SAS4 gene does not affect  
361 male gametogenesis and the gene is not essential for parasite transmission or at  
362 other stages of the life cycle.

### 363 **Materials and Methods**

364

#### 365 **Ethics statement**

366 The animal work passed an ethical review process and was approved by the United  
367 Kingdom Home Office. Work was carried out under UK Home Office Project  
368 Licenses (30/3248 and PDD2D5182) in accordance with the United Kingdom  
369 'Animals (Scientific Procedures) Act 1986'. Six- to eight-week-old female CD1  
370 outbred mice from Charles River laboratories were used for all experiments.

371

#### 372 **Generation of transgenic parasites**

373 The C-terminus of SAS4 was tagged with GFP by single crossover homologous  
374 recombination in the parasite. To generate the SAS4-GFP line, a region of the *sas4*  
375 gene downstream of the ATG start codon was amplified using primers T2011 and  
376 T2012, ligated to p277 vector, and transfected as described previously (Saini et al.,  
377 2017). A schematic representation of the endogenous *sas4* locus  
378 (PBANKA\_1322200), the constructs and the recombined *sas4* locus are shown in  
379 Fig S1A. The oligonucleotides used to generate the mutant parasite lines are  
380 described in Table S1. *P. berghei* ANKA line 2.34 (for GFP-tagging) or ANKA line



381 507cl1 expressing GFP (for gene deletion) were transfected by electroporation  
382 (Janse et al., 2006)

383 The gene-deletion targeting vector for *sas4* was constructed using the pBS-DHFR  
384 plasmid, which contains polylinker sites flanking a *T. gondii dhfr/ts* expression  
385 cassette conferring resistance to pyrimethamine, as described previously (Zeeshan  
386 et al., 2019a). PCR primers N1391 and N1392 were used to generate a 803 bp  
387 fragment of *sas4* 5' upstream sequence from genomic DNA, which was inserted into  
388 *Apal* and *HindIII* restriction sites upstream of the *dhfr/ts* cassette of pBS-DHFR. A  
389 721 bp fragment generated with primers N1393 and N1394 from the 3' flanking  
390 region of *sas4* was then inserted downstream of the *dhfr/ts* cassette using *EcoRI* and  
391 *XbaI* restriction sites. The linear targeting sequence was released using *Apal/XbaI*. A  
392 schematic representation of the endogenous *sas4* locus the constructs and the  
393 recombined *sas4* locus can be found in Fig S1C.

394

### 395 **Parasite genotype analyses**

396 For the parasites expressing a C-terminal GFP-tagged SAS4 protein, diagnostic  
397 PCR was used with primer 1 (IntT201) and primer 2 (ol492) to confirm integration of  
398 the GFP targeting construct (Fig S1B). For the gene knockout parasites, diagnostic  
399 PCR was used with primer 1 (IntN139) and primer 2 (ol248) to confirm integration of  
400 the targeting construct, and primer 3 (N139 KO1) and primer 4 (N139 KO2) were  
401 used to confirm deletion of the *sas4* gene (Fig S1D).

402

### 403 **Purification of gametocytes**

404 The purification of gametocytes was achieved using a protocol described previously  
405 (Beetsma et al., 1998) with some modifications. Briefly, parasites were injected into

406 phenylhydrazine treated mice and enriched by sulfadiazine treatment after 2 days of  
407 infection. The blood was collected on day 4 after infection and gametocyte-infected  
408 cells were purified on a 48% v/v NycoDenz (in PBS) gradient. (NycoDenz stock  
409 solution: 27.6% w/v NycoDenz in 5 mM Tris-HCl, pH 7.20, 3 mM KCl, 0.3 mM  
410 EDTA). The gametocytes were harvested from the interface and washed.

411

#### 412 **Live cell- and -time lapse imaging**

413 Purified gametocytes were examined for GFP expression and localization at different  
414 time points (1-15 min) after activation in ookinete medium containig xanthurenic acid.  
415 Images were captured using a 63x oil immersion objective on a Zeiss Axio Imager  
416 M2 microscope fitted with an AxioCam ICc1 digital camera (Carl Zeiss, Inc). Time-  
417 lapse videos (1 frame every 5 sec for 10 cycles) were taken with a 63x objective lens  
418 on the same microscope and analysed with the AxioVision 4.8.2 software as  
419 described recently (Zeeshan et al., 2020b).

420

#### 421 **Generation of dual tagged parasite lines**

422 The SAS4-GFP parasites were mixed with kinesin-8B-mCherry or NDC80-mCherry  
423 parasites in equal numbers and injected into a mouse. Mosquitoes were fed on this  
424 mouse 4 to 5 days after infection when gametocyte parasitaemia was high. These  
425 mosquitoes were checked for oocyst development and sporozoite formation at day  
426 14 and day 21 after feeding. Infected mosquitoes were then allowed to feed on naïve  
427 mice and after 4 - 5 days these mice were examined for blood stage parasitaemia by  
428 microscopy with Giemsa-stained blood smears. In this way, some parasites  
429 expressed both SAS4-GFP and kinesin-8B-mCherry or SAS4-GFP and NDC80-

430 mCherry in the resultant gametocytes. These gametocytes were purified, and  
431 fluorescence microscopy images were collected as described above.

432

### 433 **Super resolution microscopy**

434 A small volume (3  $\mu$ l) of gametocytes was mixed with Hoechst dye and pipetted onto  
435 2 % agarose pads (5x5 mm squares) at room temperature. After 3 min these  
436 agarose pads were placed onto glass bottom dishes with the cells facing towards  
437 glass surface (MatTek, P35G-1.5-20-C). Cells were scanned with an inverted  
438 microscope using Zeiss C-Apochromat 63x/1.2 W Korr M27 water immersion  
439 objective on a Zeiss Elyra PS.1 microscope, using the structured illumination  
440 microscopy (SIM) technique. The correction collar of the objective was set to 0.17 for  
441 optimum contrast. The following settings were used in SIM mode: lasers, 405 nm:  
442 20%, 488 nm: 50%; exposure times 100 ms (Hoechst) and 25 ms (GFP); three grid  
443 rotations, five phases. The band pass filters BP 420-480 + LP 750 and BP 495-550 +  
444 LP 750 were used for the blue and green channels, respectively. Multiple focal  
445 planes (Z stacks) were recorded with 0.2  $\mu$ m step size; later post-processing, a Z  
446 correction was done digitally on the 3D rendered images to reduce the effect of  
447 spherical aberration (reducing the elongated view in Z; a process previously tested  
448 with fluorescent beads). Images were processed and all focal planes were digitally  
449 merged into a single plane (Maximum intensity projection). The images recorded in  
450 multiple focal planes (Z-stack) were 3D rendered into virtual models and exported as  
451 images. Processing and export of images were done by Zeiss Zen 2012 Black  
452 edition, Service Pack 5 and Zeiss Zen 2.1 Blue edition (Zeeshan et al., 2020b).

453

### 454 **Parasite phenotype analyses**

455 Blood containing approximately 50,000 parasites of the  $\Delta$ SAS44 line was injected  
456 intraperitoneally (i.p) into mice to initiate infections. Asexual stages and gametocyte  
457 production were monitored by microscopy on Giemsa-stained thin smears. Four to  
458 five days post infection, exflagellation and ookinete conversion were examined as  
459 described previously(Zeeshan et al., 2019b) with a Zeiss AxioImager M2 microscope  
460 (Carl Zeiss, Inc) fitted with an AxioCam ICc1 digital camera. To analyse mosquito  
461 transmission, 30–50 *Anopheles stephensi* SD 500 mosquitoes were allowed to feed  
462 for 20 min on anaesthetized, infected mice with an asexual parasitemia of 15% and a  
463 comparable number of gametocytes as determined on Giemsa-stained blood films.  
464 To assess mid-gut infection, approximately 15 guts were dissected from mosquitoes  
465 on day 14 post feeding, and oocysts were counted on an AxioCam ICc1 digital  
466 camera fitted to a Zeiss AxioImager M2 microscope using a 63x oil immersion  
467 objective. On day 21 post-feeding, another 20 mosquitoes were dissected, and their  
468 guts crushed in a loosely fitting homogenizer to release sporozoites, which were then  
469 quantified using a haemocytometer. Mosquito bite back experiments were performed  
470 21 days post-feeding using naive mice, and blood smears were examined after 3-4  
471 days.

472

### 473 **Electron microscopy**

474 Gametocytes activated for 4-5 min were fixed in 4% glutaraldehyde in 0.1 M  
475 phosphate buffer and processed for electron microscopy as previously described  
476 (Zeeshan et al., 2019b). Briefly, samples were post fixed in osmium tetroxide, treated  
477 *en bloc* with uranyl acetate, dehydrated and embedded in Spurr's epoxy resin. Thin  
478 sections were stained with uranyl acetate and lead citrate prior to examination in a  
479 JEOL1200EX electron microscope (Jeol UK Ltd).

480

### 481 **Quantitative Real Time PCR (qRT-PCR) analyses**

482 RNA was isolated from gametocytes using an RNA purification kit (Stratagene).  
483 cDNA was synthesised using an RNA-to-cDNA kit (Applied Biosystems). Gene  
484 expression was quantified from 80 ng of total RNA using a SYBR green fast master  
485 mix kit (Applied Biosystems). All the primers were designed using the primer3  
486 software (Primer-blast, NCBI). Analysis was conducted using an Applied Biosystems  
487 7500 fast machine with the following cycling conditions: 95°C for 20 s followed by 40  
488 cycles of 95°C for 3 s; 60°C for 30 s. Three technical replicates and three biological  
489 replicates were performed for each assayed gene. The *hsp70* (PBANKA\_081890)  
490 and *arginyl-t RNA synthetase* (PBANKA\_143420) genes were used as endogenous  
491 control reference genes. The primers used for qPCR can be found in **Table S1**.

492

### 493 **Statistical analysis**

494 All statistical analyses were performed using GraphPad Prism 7 (GraphPad  
495 Software). For qRT-PCR, an unpaired t-test was used to examine significant  
496 differences between wild-type and mutant strains.

497

### 498 **Funding**

499 This work was supported by: MRC UK (G0900278, MR/K011782/1) and BBSRC  
500 (BB/N017609/1) to RT and MZ; the Francis Crick Institute (FC001097), the Cancer  
501 Research UK (FC001097), the UK Medical Research Council (FC001097), and the  
502 Wellcome Trust (FC001097) to AAH. The super resolution microscope facility was  
503 funded by the BBSRC grant BB/L013827/1. For the purpose of Open Access, the

504 author has applied a CC BY public copyright licence to any Author Accepted  
505 Manuscript version arising from this submission.

506

## 507 **Acknowledgement**

508 We thank the Oxford Brookes Centre for Bioimaging for assistance.

509

## 510 **Figure legends**

### 511 **Fig 1. Localization of SAS4-GFP during male gametogenesis.**

512 **(A)** Live cell imaging of SAS4-GFP expression and location during  
513 endoreduplicative mitotic division in male gametogenesis. Scale bar = 5  $\mu\text{m}$ .  
514 Schematic guide showing SAS4-GFP location in relation to nucleus (DNA) during  
515 male gametogenesis **(B)** Time-lapse screenshots for SAS4-GFP localization in male  
516 gametocytes at 1-2 min and 3-4 min post activation during male gametogenesis.  
517 Scale bar = 5  $\mu\text{m}$ . **(C)** Super-resolution 3D imaging for SAS4-GFP localization in  
518 gametocytes fixed at 2- and 4- min post activation. Scale bar = 1  $\mu\text{m}$ .

519

### 520 **Figure 2. The location of SAS4 in relation to that of the basal body and**

521 **axoneme (kinesin-8B) and kinetochore (NDC80) markers.**

522 **(A)** The location of SAS4-GFP (green) in relation to the basal body and axoneme  
523 marker, kinesin-8B-mCherry (red) during male gamete formation. SAS4 shows a  
524 cytoplasmic location like kinesin-8B and remains associated with it during basal body  
525 biogenesis and axoneme formation throughout male gamete formation. Scale bar = 5  
526  $\mu\text{m}$ . Right hand panel shows super-resolution 3D imaging for SAS4-GFP and  
527 kinesin-8B-mCherry localization in gametocytes fixed at 1-2 min post activation.  
528 Scale bar = 1  $\mu\text{m}$ . **(B)** The location of SAS4-GFP (green) in relation to the

529 kinetochore marker, NDC80-mCherry (red) during male gamete formation. The  
530 cytoplasmic location of SAS4 contrasts with the nuclear location of NDC80 during  
531 chromosome replication and segregation, indicating that SAS4 is not associated with  
532 the mitotic spindle. Scale bar = 5  $\mu$ m. Right hand panel shows super-resolution 3D  
533 imaging for SAS4-GFP and NDC80-mCherry localization in gametocytes fixed at 2-3  
534 min post activation. Scale bar = 1.

535

536 **Figure 3. SAS4 is a part of the outer centriolar MTOC (basal body).**

537 **(A)** Electron microscopy on 4-5 min post-activation gametocyte reveals the relative  
538 locations of basal body, nuclear pole, and kinetochore. Section through the  
539 microgametocyte showing a large central nucleus (N) with basal body (BB) in the  
540 peripheral cytoplasm. Scale bar = 1  $\mu$ m. Enlargement of the enclosed area showing  
541 the details of each basal body (s) with axoneme in cytoplasmic compartment  
542 separated by a nuclear membrane (NM), an intranuclear spindle with attached  
543 kinetochores (K) radiating from the nuclear poles (NP). Scale bar = 100nm. **(B)** A  
544 schematic diagram showing outer centriolar MTOC (basal body) and inner  
545 acentriolar MTOC (NP) serving as microtubule organising centres for axoneme and  
546 intranuclear spindle respectively.

547

548 **Fig 4. SAS4 is dispensable for parasite proliferation and transmission. (A)** qRT-  
549 PCR analysis of SAS4 transcript in the  $\Delta$ SAS4 and WT-GFP parasites to show the  
550 complete depletion of *sas4*. **(B)** Male gametogenesis (exflagellation) of  $\Delta$ SAS4  
551 parasites compared with WT-GFP parasites measured as the number of  
552 exflagellation centres per field. Mean  $\pm$  SEM. n=3 independent experiments. **(C)**  
553 Ookinete conversion as a percentage for  $\Delta$ SAS4 and WT-GFP parasites. Ookinetes

554 were identified using 13.1 antibody as a surface marker (P28) and defined as those  
555 cells that differentiated successfully into elongated 'banana shaped' ookinetes. Mean  
556  $\pm$  SEM. n=3 independent experiments. **(D)** Total number of GFP-positive oocysts per  
557 infected mosquito in  $\Delta$ SAS4 compared to WT-GFP parasites at 14 and 21-day post  
558 infection. Mean  $\pm$  SEM. n= 3 independent experiments. **(E)** Mid guts at 10x and 63x  
559 magnification showing oocysts of  $\Delta$ SAS4 and WT-GFP lines at 14 dpi. Scale bar=50  
560  $\mu$ M in 10x and 20  $\mu$ M in 63x. **(F)** Total number of sporozoites in oocysts of  $\Delta$ SAS4  
561 and WT-GFP parasites at 14 and 21 dpi. Mean  $\pm$  SEM. n= 3 independent  
562 experiments. **(G)** Total number of sporozoites in salivary glands of  $\Delta$ SAS4 and WT-  
563 GFP parasites. Bar diagram shows mean  $\pm$  SEM. n= 3 independent experiments.  
564 ns=non-significant **(H)** Bite back experiments showing successful transmission of  
565 WT-GFP and  $\Delta$ SAS4 parasites from mosquito to mice. Mean  $\pm$  SEM. n= 3  
566 independent experiments.

567

## 568 **Supplementary materials**

### 569 **Supplementary Figures**

#### 570 **Fig S1. Generation and genotypic analysis of SAS4-GFP and $\Delta$ SAS4 parasites**

571 **(A)** Schematic representation of the endogenous *Pbsas4* locus, the GFP-tagging  
572 construct and the recombined *sas4* locus following single homologous  
573 recombination. Arrows 1 and 2 indicate the position of PCR primers used to confirm  
574 successful integration of the construct. **(B)** Diagnostic PCR of *SAS4-GFP* (tag) and  
575 WT parasites using primers IntT201 (Arrow 1) and ol492 (Arrow 2). Integration of the  
576 *sas4* tagging construct gives a band of 1159 bp. **(C)** Schematic representation of  
577 *Pbsas4* locus, knockout construct and the recombined *sas4* locus following double  
578 homologous recombination. Arrows 1 (intN139) and 2 (ol248) indicate the primers



579 position used to confirm 5' integration and arrows 3 (N139KO1) and 4 (N139KO1)  
580 indicate the primers used to check the deletion of gene **(D)** Integration PCR of the  
581 *sas4* locus in WTGFP (WT) and knockout (Mut) parasites showing expected band  
582 size of integration in knockout parasites and knockout (KO) PCR showing deletion  
583 from mut parasites.

584

585 **Fig S2. Electron micrographs of gametocyte reveals the relative locations of**  
586 **basal body, nuclear pole, and kinetochore**

587 Enlarged electron micrographs of gametocytes activated for 4-5 min showing the  
588 details of basal body (bb) with axoneme (A) in cytoplasmic compartment separated  
589 by a nuclear membrane (NM), an intranuclear spindle with attached kinetochores (K)  
590 radiating from the nuclear poles (NP). Scale bar = 100nm.

591 **Supplementary Tables**

592 **Table S1.** Oligonucleotides used in this study.

593

594 **Supplementary Videos**

595 **Video S1.** Video for SAS4-GFP localization in male gametocytes at 1-2 min post  
596 activation

597 **Video S1.** Video for SAS4-GFP localization in male gametocytes at 3-4 min post  
598 activation

599

600 **References**

601 Arnot, D.E., E. Ronander, and D.C. Bengtsson. 2011. The progression of the intra-  
602 erythrocytic cell cycle of *Plasmodium falciparum* and the role of the centriolar  
603 plaques in asynchronous mitotic division during schizogony. *Int J Parasitol.*  
604 41:71-80.

- 605 Beetsma, A.L., T.J. van de Wiel, R.W. Sauerwein, and W.M. Eling. 1998.  
606 *Plasmodium berghei* ANKA: purification of large numbers of infectious  
607 gametocytes. *Exp Parasitol.* 88:69-72.
- 608 Bertiaux, E., A.C. Balestra, L. Bournonville, V. Louvel, B. Maco, D. Soldati-Favre, M.  
609 Brochet, P. Guichard, and V. Hamel. 2021. Expansion microscopy provides  
610 new insights into the cytoskeleton of malaria parasites including the  
611 conservation of a conoid. *PLoS Biol.* 19:e3001020.
- 612 Carvalho-Santos, Z., J. Azimzadeh, J.B. Pereira-Leal, and M. Bettencourt-Dias.  
613 2011. Evolution: Tracing the origins of centrioles, cilia, and flagella. *J Cell Biol.*  
614 194:165-175.
- 615 Carvalho-Santos, Z., P. Machado, P. Branco, F. Tavares-Cadete, A. Rodrigues-  
616 Martins, J.B. Pereira-Leal, and M. Bettencourt-Dias. 2010. Stepwise evolution  
617 of the centriole-assembly pathway. *J Cell Sci.* 123:1414-1426.
- 618 Depoix, D., S.R. Marques, D.J. Ferguson, S. Chaouch, T. Duguet, R.E. Sinden, P.  
619 Grellier, and L. Kohl. 2020. Vital role for *Plasmodium berghei* Kinesin8B in  
620 axoneme assembly during male gamete formation and mosquito  
621 transmission. *Cell Microbiol.* 22:e13121.
- 622 Ferguson, D.J., A. Birch-Andersen, W.M. Hutchison, and J.C. Simm. 1977. The  
623 ultrastructure and distribution of micropores in the various developmental  
624 forms of *Eimeria brunetti*. *Acta Pathol Microbiol Scand B.* 85B:363-373.
- 625 Ferguson, D.J., W.M. Hutchison, J.F. Dunachie, and J.C. Siim. 1974. Ultrastructural  
626 study of early stages of asexual multiplication and microgametogony of  
627 *Toxoplasma gondii* in the small intestine of the cat. *Acta Pathol Microbiol*  
628 *Scand B Microbiol Immunol.* 82:167-181.

- 629 Fritz-Laylin, L.K., and C. Fulton. 2016. Naegleria: a classic model for de novo basal  
630 body assembly. *Cilia*. 5:10.
- 631 Fritz-Laylin, L.K., Y.Y. Levy, E. Levitan, S. Chen, W.Z. Cande, E.Y. Lai, and C.  
632 Fulton. 2016. Rapid centriole assembly in Naegleria reveals conserved roles  
633 for both de novo and mentored assembly. *Cytoskeleton (Hoboken)*. 73:109-  
634 116.
- 635 Gerald, N., B. Mahajan, and S. Kumar. 2011. Mitosis in the human malaria parasite  
636 Plasmodium falciparum. *Eukaryot Cell*. 10:474-482.
- 637 Gomes Pereira, S., A.L. Sousa, C. Nabais, T. Paixao, A.J. Holmes, M. Schorb, G.  
638 Goshima, E.M. Tranfield, J.D. Becker, and M. Bettencourt-Dias. 2021. The 3D  
639 architecture and molecular foundations of de novo centriole assembly via  
640 bicentrioles. *Curr Biol*. 31:4340-4353 e4347.
- 641 Hodges, M.E., N. Scheumann, B. Wickstead, J.A. Langdale, and K. Gull. 2010.  
642 Reconstructing the evolutionary history of the centriole from protein  
643 components. *J Cell Sci*. 123:1407-1413.
- 644 Hu, H., Q. Zhou, and Z. Li. 2015. SAS-4 Protein in Trypanosoma brucei Controls Life  
645 Cycle Transitions by Modulating the Length of the Flagellum Attachment Zone  
646 Filament. *J Biol Chem*. 290:30453-30463.
- 647 Janse, C.J., J. Ramesar, and A.P. Waters. 2006. High-efficiency transfection and  
648 drug selection of genetically transformed blood stages of the rodent malaria  
649 parasite Plasmodium berghei. *Nat Protoc*. 1:346-356.
- 650 Mahajan, B., A. Selvapandiyan, N.J. Gerald, V. Majam, H. Zheng, T.  
651 Wickramarachchi, J. Tiwari, H. Fujioka, J.K. Moch, N. Kumar, L. Aravind, H.L.  
652 Nakhasi, and S. Kumar. 2008. Centrin, cell cycle regulation proteins in

653 human malaria parasite *Plasmodium falciparum*. *J Biol Chem*. 283:31871-  
654 31883.

655 Marques, S.R., C. Ramakrishnan, R. Carzaniga, A.M. Blagborough, M.J. Delves,  
656 A.M. Talman, and R.E. Sinden. 2015. An essential role of the basal body  
657 protein SAS-6 in *Plasmodium* male gamete development and malaria  
658 transmission. *Cell Microbiol*. 17:191-206.

659 Marshall, W.F. 2008. Basal bodies platforms for building cilia. *Curr Top Dev Biol*.  
660 85:1-22.

661 Nabais, C., C. Peneda, and M. Bettencourt-Dias. 2020. Evolution of centriole  
662 assembly. *Curr Biol*. 30:R494-R502.

663 Nabais, C., S.G. Pereira, and M. Bettencourt-Dias. 2017. Noncanonical Biogenesis  
664 of Centrioles and Basal Bodies. *Cold Spring Harb Symp Quant Biol*. 82:123-  
665 135.

666 Rashpa, R., and M. Brochet. 2021. Ultrastructure expansion microscopy of  
667 *Plasmodium* gametocytes reveals the molecular architecture of a microtubule  
668 organisation centre coordinating mitosis with axoneme assembly. *bioRxiv*.

669 Roques, M., R.R. Stanway, E.I. Rea, R. Markus, D. Brady, A.A. Holder, D.S. Guttery,  
670 and R. Tewari. 2019. *Plasmodium* centrin PbCEN-4 localizes to the putative  
671 MTOC and is dispensable for malaria parasite proliferation. *Biol Open*. 8.

672 Saini, E., M. Zeeshan, D. Brady, R. Pandey, G. Kaiser, L. Koreny, P. Kumar, V.  
673 Thakur, S. Tatiya, N.J. Katris, R.S. Limenitakis, I. Kaur, J.L. Green, A.R.  
674 Bottrill, D.S. Guttery, R.F. Waller, V. Heussler, A.A. Holder, A. Mohammed, P.  
675 Malhotra, and R. Tewari. 2017. Photosensitized INA-Labelled protein 1  
676 (PhIL1) is novel component of the inner membrane complex and is required  
677 for *Plasmodium* parasite development. *Sci Rep*. 7:15577.

- 678 Simon, C.S., C. Funaya, J. Bauer, Y. Vobeta, M. Machado, A. Penning, D. Klaschka,  
679 M. Cyrklaff, J. Kim, M. Ganter, and J. Guizetti. 2021. An extended DNA-free  
680 intranuclear compartment organizes centrosome microtubules in malaria  
681 parasites. *Life Sci Alliance*. 4.
- 682 Sinden, R.E. 1991. Mitosis and meiosis in malarial parasites. *Acta Leiden*. 60:19-27.
- 683 Sinden, R.E., E.U. Canning, and B. Spain. 1976. Gametogenesis and fertilization in  
684 *Plasmodium yoelii nigeriensis*: a transmission electron microscope study.  
685 *Proc R Soc Lond B Biol Sci*. 193:55-76.
- 686 Sinden, R.E., A. Talman, S.R. Marques, M.N. Wass, and M.J. Sternberg. 2010. The  
687 flagellum in malarial parasites. *Curr Opin Microbiol*. 13:491-500.
- 688 Straschil, U., A.M. Talman, D.J. Ferguson, K.A. Bunting, Z. Xu, E. Bailes, R.E.  
689 Sinden, A.A. Holder, E.F. Smith, J.C. Coates, and T. Rita. 2010. The  
690 Armadillo repeat protein PF16 is essential for flagellar structure and function  
691 in *Plasmodium* male gametes. *PLoS One*. 5:e12901.
- 692 Suvorova, E.S., M. Francia, B. Striepen, and M.W. White. 2015. A novel bipartite  
693 centrosome coordinates the apicomplexan cell cycle. *PLoS Biol*.  
694 13:e1002093.
- 695 Vaughan, S., and K. Gull. 2015. Basal body structure and cell cycle-dependent  
696 biogenesis in *Trypanosoma brucei*. *Cilia*. 5:5.
- 697 Zeeshan, M., D. Brady, R.R. Stanway, C.A. Moores, A.A. Holder, and R. Tewari.  
698 2020a. *Plasmodium berghei* Kinesin-5 Associates With the Spindle Apparatus  
699 During Cell Division and Is Important for Efficient Production of Infectious  
700 Sporozoites. *Front Cell Infect Microbiol*. 10:583812.
- 701 Zeeshan, M., D.J. Ferguson, S. Abel, A. Burrell, E. Rea, D. Brady, E. Daniel, M.  
702 Delves, S. Vaughan, A.A. Holder, K.G. Le Roch, C.A. Moores, and R. Tewari.

703           2019a. Kinesin-8B controls basal body function and flagellum formation and is  
704           key to malaria transmission. *Life Sci Alliance*. 2.

705   Zeeshan, M., R. Pandey, D.J.P. Ferguson, E.C. Tromer, R. Markus, S. Abel, D.  
706   Brady, E. Daniel, R. Limenitakis, A.R. Bottrill, K.G. Le Roch, A.A. Holder, R.F.  
707   Waller, D.S. Guttery, and R. Tewari. 2020b. Real-time dynamics of  
708   Plasmodium NDC80 reveals unusual modes of chromosome segregation  
709   during parasite proliferation. *J Cell Sci*. 134.

710   Zeeshan, M., F. Shilliday, T. Liu, S. Abel, T. Mourier, D.J.P. Ferguson, E. Rea, R.R.  
711   Stanway, M. Roques, D. Williams, E. Daniel, D. Brady, A.J. Roberts, A.A.  
712   Holder, A. Pain, K.G. Le Roch, C.A. Moores, and R. Tewari. 2019b.  
713   Plasmodium kinesin-8X associates with mitotic spindles and is essential for  
714   oocyst development during parasite proliferation and transmission. *PLoS*  
715   *Pathog*. 15:e1008048.

716

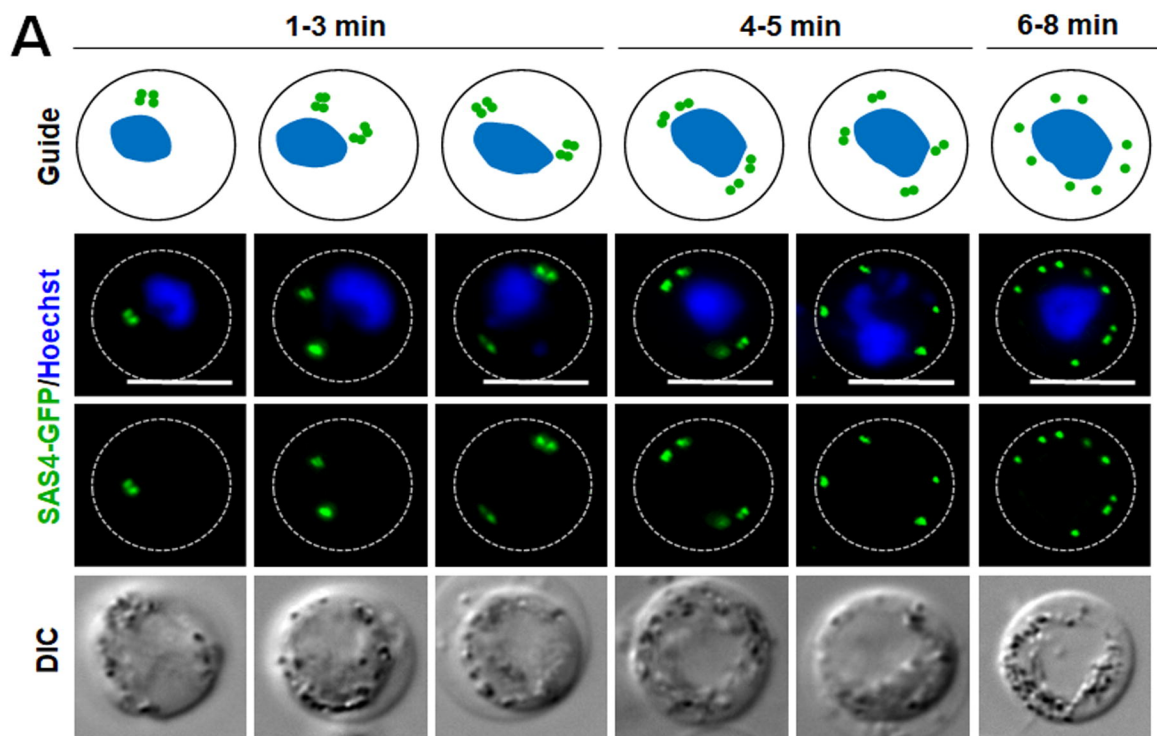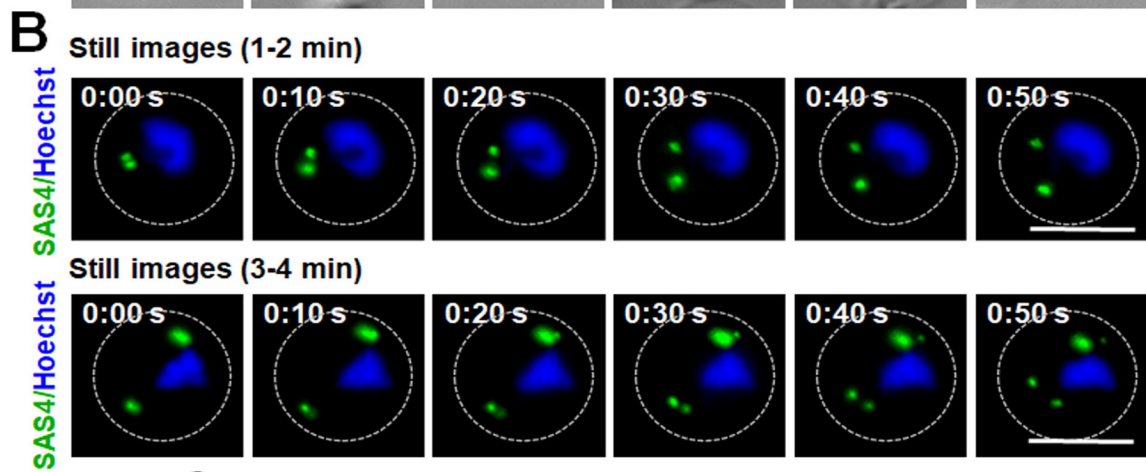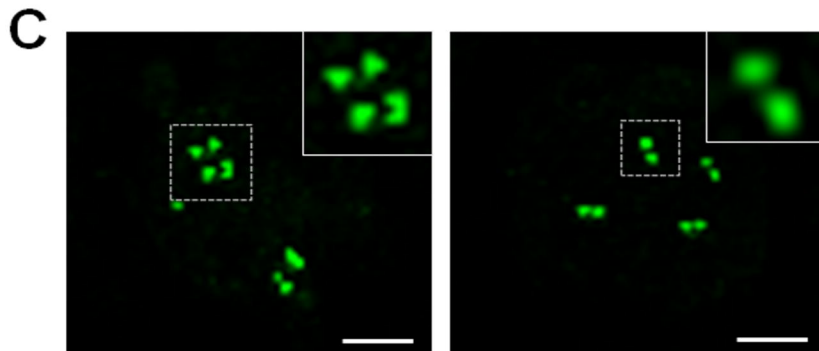

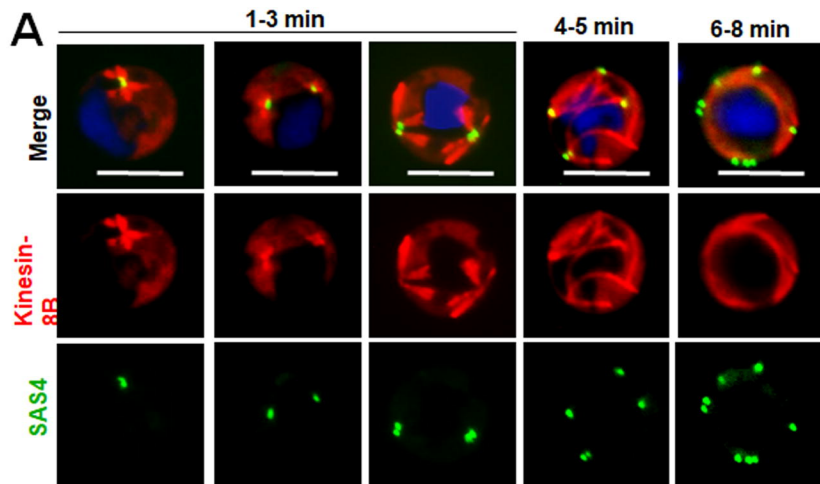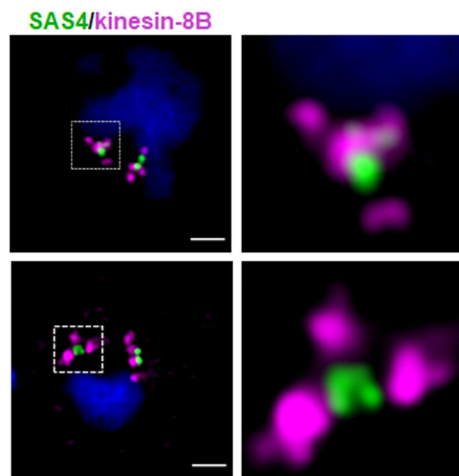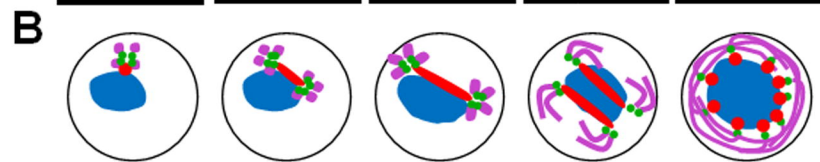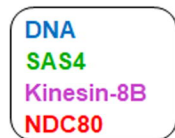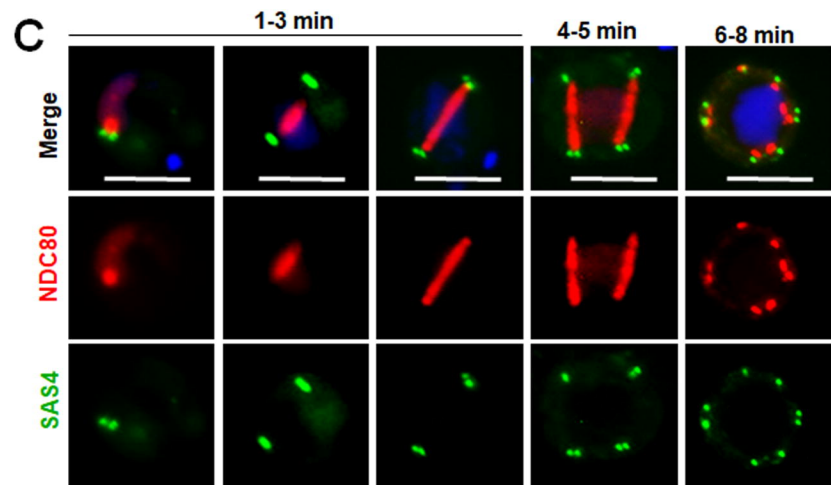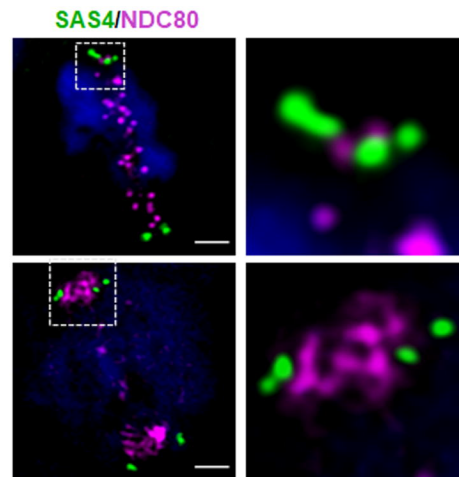



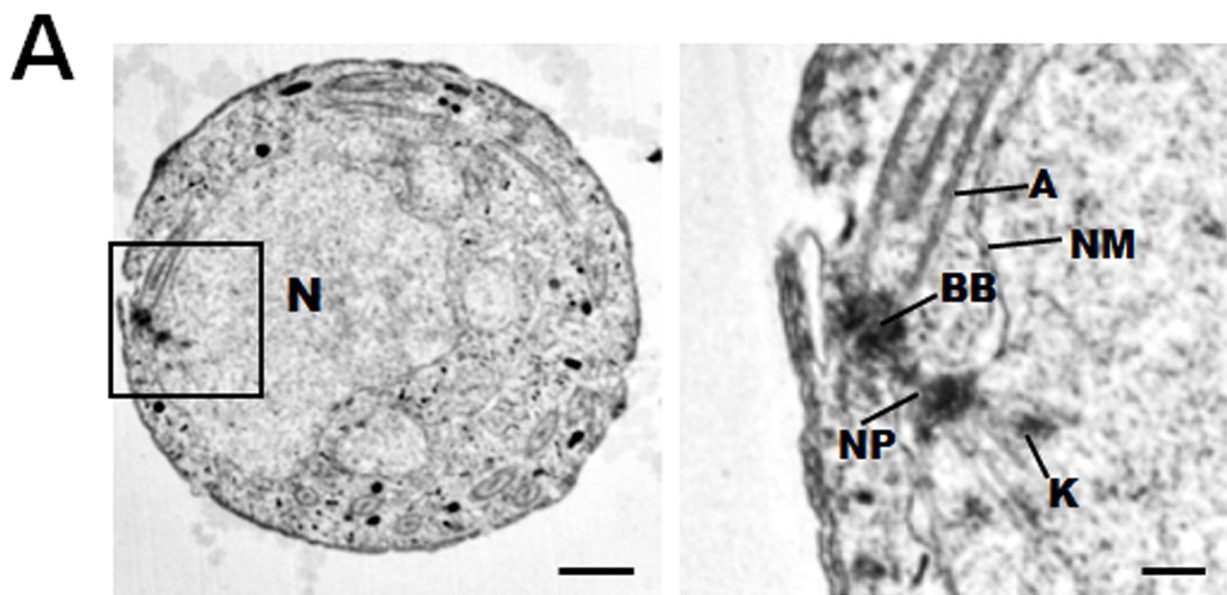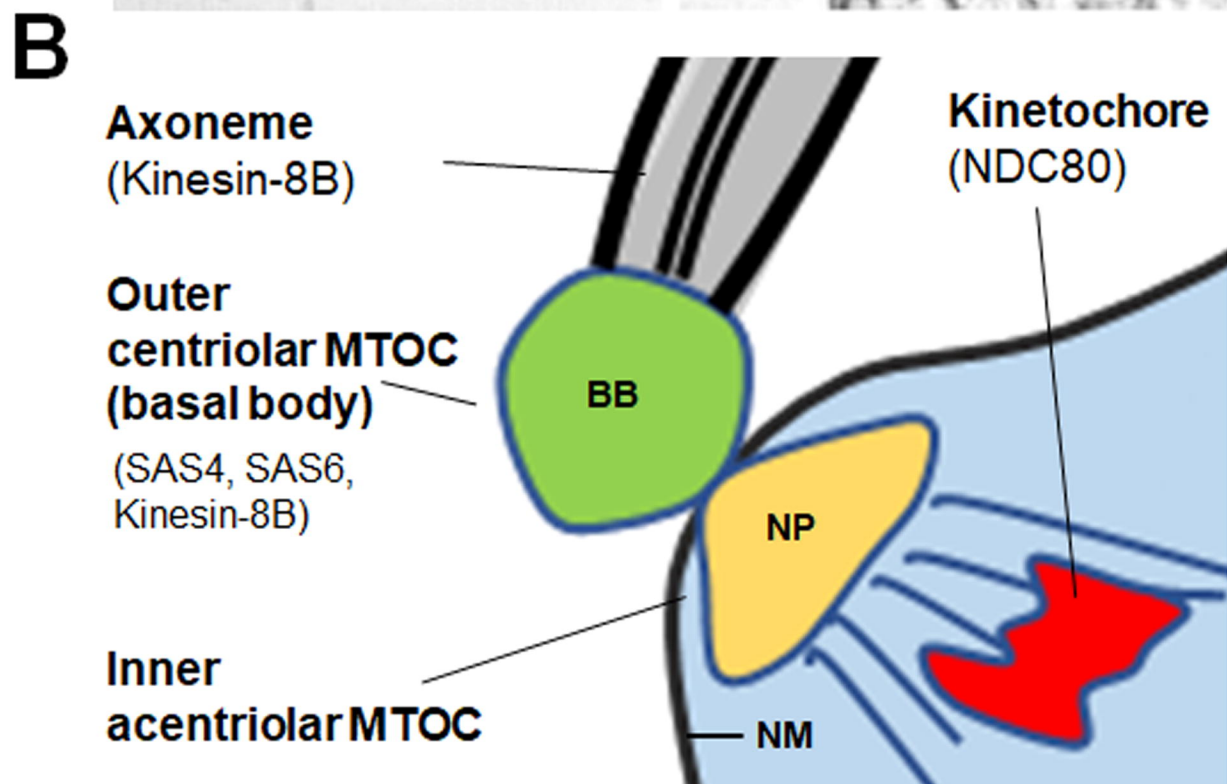

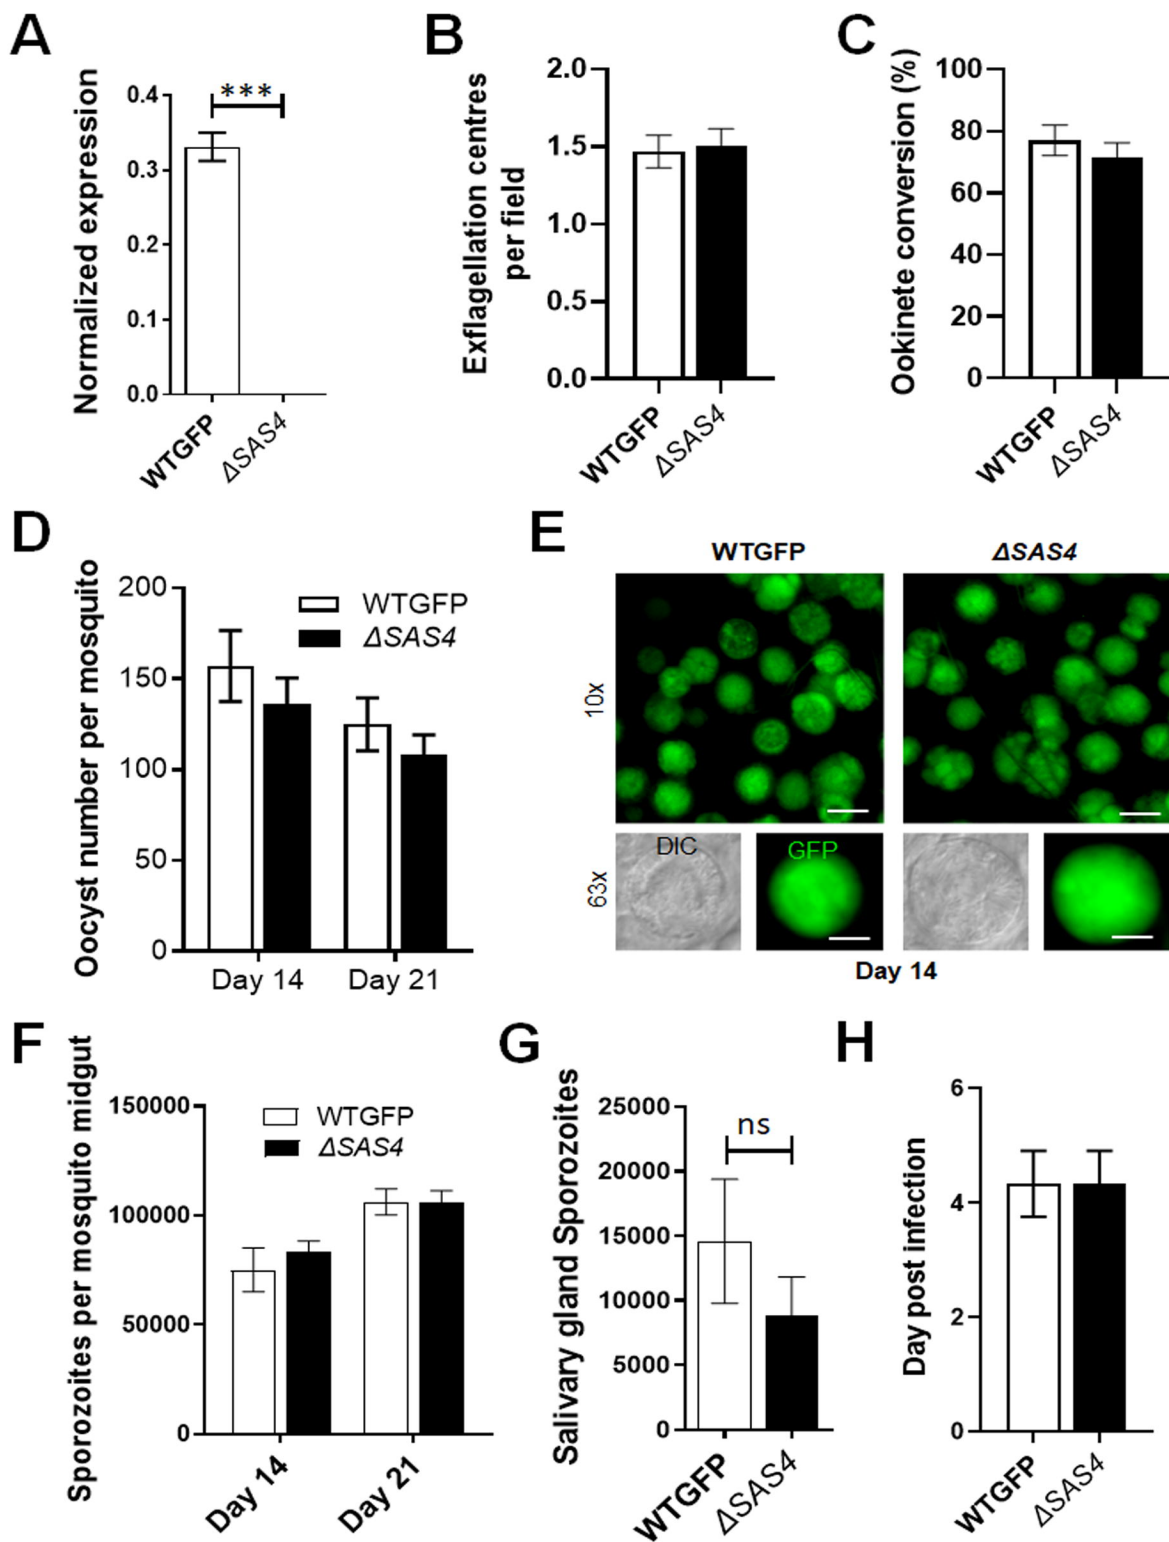

Source: http://biorxiv.org/content/10.1101/2021.12.03.471138v1.full.pdf
